# Supplementary material for: Establishment and characterization of an equine skeletal muscle in vitro platform: gene expression validation and hypoxia-responsive signatures
Source: Research Square preprint supplement (doi:10.21203/rs.3.rs-8374782/v1), 2025-12-22
Supplement: Supplementary file 1 [file 108415b8f24cc0d547223bde.docx]

**Table S1.** Primer sequences designed for qPCR analysis of equine skeletal muscle samples.

| **Gene** | **Name** | **Function** | **GenBank Accession No.** | **Forward Primer (5’)** | **Reverse Primer (3’)** | **Amplicon size (bp)** |
| --- | --- | --- | --- | --- | --- | --- |
| *ACTB* | β-actin | Cytoskeletal structural protein | NC_009156.3 | tactcctgcttgctgatcca | gatgcagaaggagatcacagc | 150 |
| *B2M* | β-2-microglobulin | Cytoskeletal protein involved in cell locomotion | NC_009144.3 | ctgctgggtgacgtgagtaa | tgctgctgtggtagctatgg | 137 |
| *GAPDH* | glyceraldehyde-3-phosphate dehydrogenase | Glycolytic enzyme | NM_001163856.1 | cagtgacacccactcttcca | cagggggctcttactccttg | 158 |
| *HPRT* | hypoxanthine phosphoribosyltransferase | Metabolic salvage of purines in mammals | NC_009175.3 | tgctgaggatttggaaaagg | aatccagcaggtcagcaaag | 158 |
| *RN18S* | ribosomal RNA 18S | Member of ribosome RNA | NW_019643269.1 | tagagggacaagtggcgttc | cgctgagccagtcagtgtag | 104 |
| *RPL32* | ribosomal protein L32 | Member of ribosomal proteins | NC_009159.3 | aagttcattcggcaccagtc | ttgacattgtggaccaggaa | 194 |
| *SDHA* | succinate dehydrogenase complex subunit A | Electron transporter in the TCA cycle and respiratory chain | NC_009164.3 | cgcaaagcatcaggttctg | cagtgttccgtgtgggaag | 153 |
| *TFRC* | transferrin receptor | Iron uptake | NC_009162.3 | ggaattcccaggggataaga | ggactttgcagctccaggac | 163 |
| *MYOD* | myogenic differentiation 1 | regulator of skeletal muscle differentiation | NC_091690.1 | gcccaaggtggagatcct | agtcgccgctgtagtgct | 158 |
| *MYF5* | Myogenic Factor 5 | transcription factor for skeletal muscle development, function, and regeneration | NC_091711.1 | attccttcccccaccaactg | accagagactccccaaagtg | 150 |
| *MYOG* | Myogenin | initiates the terminal differentiation of muscle | NC_091713.1 | tcacggctgaccctacagatg | ggtgatgctgtccacaatgg | 145 |
| *HIF1A* | alpha subunit of transcription factor hypoxia-inducible factor-1 | regulates cellular and systemic responses to hypoxia | NC_091707.1 | tgatgggatatgagccagaa | cccagacatatccccctctt | 126 |
| *Pax7* | maintenance of skeletal muscle precursor cells | paired box 7 | NC_091685.1 | gtgtggagaggctcacgttt | catcaagccgggagacag | 150 |

1 Primers were positioned across exon–exon junctions and targeted conserved regions of the genes to ensure stable expression measurements in the presence of multiple transcript variants. Amplicon lengths were optimized to 104–194 bp, and primer specificity was confirmed in silico using BLAST, with amplification efficiency and product identity verified by melting curve analysis.
