# Supplementary material for: Establishment and characterization of an equine skeletal muscle in vitro platform: gene expression validation and hypoxia-responsive signatures
Source: Research Square preprint supplement (doi:10.21203/rs.3.rs-8374782/v1), 2025-12-22
Supplement: Supplementary file 2 [file 425d7fb522d2ea04cdc777c4.docx]

| Sample Name | *HIF* | *MyoD* | *Myf5* | *Pax7* | *MyoG* | *ACTB* | *GAPDH* | *SDHA* | *TFRC* | *RPL32* | *RN18S* | *HPRTF* | *B2M* |
| --- | --- | --- | --- | --- | --- | --- | --- | --- | --- | --- | --- | --- | --- |
| Sample 1 | 23,30322 | 36,07356 | 22,48342 | 34,18302 | 22,36548 | 16,88197 | 34,66829 | 23,980413 | 24,31137 | 20,93547 | 8,967167 | 24,64261 | 23,13982 |
| Sample 2 | 23,38439 | 35,4771 | 22,83785 | 34,46669 | 21,60862 | 17,25195 | 34,23491 | 24,115107 | 24,19464 | 21,07973 | 9,253597 | 25,07864 | 23,23285 |
| Sample 3 | 22,92396 | 32,91084 | 22,36889 | 34,06671 | 21,81863 | 16,72119 | 33,7962 | 23,694483 | 23,71546 | 20,44944 | 8,791553 | 24,31392 | 22,92996 |
| Sample 4 | 22,55278 | 36,82923 | 24,9429 | 33,97459 | 26,60943 | 16,35543 | 34,02311 | 23,715971 | 23,54836 | 19,84513 | 8,69754 | 24,52776 | 23,29465 |
| Sample 6 | 22,03351 | 30,44542 | 22,06267 | 32,97245 | 22,61229 | 16,6461 | 34,02611 | 23,674139 | 23,9939 | 19,1401 | 8,715983 | 23,95852 | 22,04172 |
| Sample 7 | 22,11112 | 31,17903 | 21,44897 | 32,89082 | 22,84527 | 16,54642 | 34,01225 | 24,109533 | 26,64957 | 19,2246 | 8,461568 | 23,44506 | 21,60863 |
| Sample 8 | 22,95526 | 29,08275 | 21,62544 | 33,90973 | 22,36559 | 16,30897 | 34,34452 | 23,45616 | 23,07373 | 19,45981 | 8,873256 | 24,66192 | 21,81765 |
| Sample 9 | 22,27012 | 29,65484 | 22,06205 | 34,21904 | 22,71941 | 16,16375 | 34,13842 | 23,603951 | 24,26365 | 19,41051 | 8,442288 | 23,72468 | 22,02615 |
| Sample 10 | 22,24684 | 27,8649 | 23,33963 | 33,28355 | 20,96961 | 15,96495 | 33,65081 | 23,256308 | 23,77228 | 19,23746 | 8,042487 | 23,255 | 21,21675 |
| Sample 11 | 23,25289 | 28,81339 | 23,67576 | 33,118 | 21,45548 | 16,57884 | 33,54802 | 23,998892 | 24,36836 | 19,61699 | 8,869973 | 23,92992 | 22,3016 |
| Sample 12 | 23,07269 | 27,45777 | 24,01083 | 33,03145 | 21,77644 | 16,73695 | 33,3236 | 23,889582 | 24,09477 | 19,94634 | 9,164073 | 24,42557 | 22,58463 |
| Sample 13 | 23,3342 | 27,58943 | 23,47197 | 33,45485 | 21,74487 | 17,053 | 33,39139 | 23,755728 | 23,77535 | 20,18644 | 9,257995 | 24,22777 | 22,4773 |
|  |  |  |  |  |  |  |  |  |  |  |  |  |  |
| mean | 22,78675 | 31,11486 | 22,86087 | 33,63091 | 22,40759 | 16,60079 | 33,9298 | 23,770855 | 24,14679 | 19,87767 | 8,79479 | 24,18261 | 22,38931 |
| SD | 0,453228 | 3,409516 | 1,04898 | 0,563303 | 1,439279 | 0,367641 | 0,401992 | 0,2616905 | 0,871568 | 0,66285 | 0,359278 | 0,536814 | 0,674485 |

Supplementary Table 1. Detailed mean Ct values for all samples and all genes

This table provides a comprehensive overview of the mean cycle threshold (Ct) values obtained for each gene across all analyzed samples. The data include both reference (housekeeping) genes and target genes of interest, measured in all technical replicates.
